# Supplementary material for: Proton-Pump Inhibitors and Serum Concentrations of Uremic Toxins in Patients with Chronic Kidney Disease
Source: MDPI journal article supplement (doi:10.3390/toxins15040276), 2023-04-07
Supplement: s1 [file s1]

Table S1. Characteristics comparison between included and non-included patients in the sub-cohort

| <b>Characteristics</b>                              | <b>Overall (N = 3033)<sup>a</sup></b> | <b>Included in the sub-cohort (n=680)<sup>a</sup></b> | <b>Not included in the sub-cohort (n=2353)<sup>a</sup></b> | <b>P-value<sup>b</sup></b> |
|-----------------------------------------------------|---------------------------------------|-------------------------------------------------------|------------------------------------------------------------|----------------------------|
| <b>Age at baseline (years)</b>                      | 69 [60-76]                            | 68 [61-77]                                            | 69 [60-76]                                                 | 0.77                       |
| <b>Men</b>                                          | 65.4%                                 | 69%                                                   | 64.3%                                                      | 0.02                       |
| <b>eGFR at baseline (ml/min/1.73 m<sup>2</sup>)</b> | 32 [23-41]                            | 32 [23-41]                                            | 32 [23-41]                                                 | 0.89                       |
| <b>Albuminuria categories</b>                       |                                       |                                                       |                                                            | 0.39                       |
| A1 (Normal to mildly increased)                     | 27.8%                                 | 30%                                                   | 27.2%                                                      |                            |
| A2 (Moderately increased)                           | 31.2%                                 | 30%                                                   | 31.6%                                                      |                            |
| A3 (Severely increased)                             | 40.9%                                 | 40%                                                   | 41.1%                                                      |                            |
| NA                                                  | 275                                   | 58                                                    | 217                                                        |                            |
| <b>History of acute kidney injury</b>               | 23.6%                                 | 21%                                                   | 24.4%                                                      | 0.08                       |
| NA                                                  | 244                                   | 51                                                    | 193                                                        |                            |
| <b>Smoking status</b>                               |                                       |                                                       |                                                            | 0.17                       |
| Never-smoker                                        | 41.3%                                 | 38%                                                   | 42%                                                        |                            |
| Current smoker                                      | 11.9%                                 | 13%                                                   | 12%                                                        |                            |
| Former smoker                                       | 46.8%                                 | 49%                                                   | 46%                                                        |                            |
| NA                                                  | 23                                    | 5                                                     | 18                                                         |                            |
| <b>Hypertension</b>                                 | 96.3%                                 | 96.6%                                                 | 96.2%                                                      | 0.64                       |
| NA                                                  | 7                                     | 2                                                     | 5                                                          |                            |
| <b>Diabetes</b>                                     | 43.2%                                 | 40%                                                   | 44%                                                        | 0.08                       |
| NA                                                  | 7                                     | 2                                                     | 5                                                          |                            |
| <b>Dyslipidemia</b>                                 | 73.6%                                 | 73%                                                   | 73.9%                                                      | 0.46                       |
| NA                                                  | 14                                    | 3                                                     | 11                                                         |                            |
| <b>History of cardiovascular disease</b>            | 53.3%                                 | 52%                                                   | 53.6%                                                      | 0.52                       |
| NA                                                  | 42                                    | 4                                                     | 38                                                         |                            |
| <b>Serum albumin (g/l)</b>                          | 40.3 [38.0-43.0]                      | 40.5 [37.8-43]                                        | 40.2 [38.0-43.0]                                           | 0.91                       |
| NA                                                  | 489                                   | 94                                                    | 395                                                        |                            |
| <b>Hemoglobin (g/dl)</b>                            | 13 (1.65)                             | 13.1 (1.64)                                           | 12.9 (1.65)                                                | 0.07                       |
| NA                                                  | 23                                    | 4                                                     | 19                                                         |                            |
| <b>High-sensitivity C-reactive protein (mg/l)</b>   | 2 [1-6]                               | 2 [1-6]                                               | 3 (1, 6)                                                   | 0.92                       |
| NA                                                  | 356                                   | 0                                                     | 356                                                        |                            |
| <b>Body mass index (kg/m<sup>2</sup>)</b>           | 27.8 [24.6-31.8]                      | 28 [25.2-31.4]                                        | 27.8 [24.5-31.9]                                           | 0.56                       |
| NA                                                  | 65                                    | 8                                                     | 57                                                         |                            |
| <b>Proton pump inhibitor</b>                        | 32.8%                                 | 31%                                                   | 33.3%                                                      | 0.25                       |
| NA                                                  | 7                                     | 0                                                     | 7                                                          |                            |

|                                    |          |          |           |      |
|------------------------------------|----------|----------|-----------|------|
| <b>Total number of medications</b> | 8 [5-10] | 8 [5-10] | 8 (5, 10) | 0.36 |
| NA                                 | 9        | 2        | 7         |      |

<sup>a</sup> Median [interquartile range] or mean (standard deviation); %

<sup>b</sup> Wilcoxon rank sum test; Pearson's Chi-squared test

Table S2. Different types of PPI and their affinity to OAT1/3

| Types of PPI | Plasma Protein Binding [22] | Affinity to OAT1                | Affinity to OAT3         |
|--------------|-----------------------------|---------------------------------|--------------------------|
| Omeprazole   | 95-96%                      | Strongly high affinity [21, 23] | High affinity [21-24]    |
| Esomeprazole | 97%                         | Limited data [23]               | High affinity [22-24]    |
| Pantoprazole | 92%                         | Moderate affinity [21]          | High affinity [21,22,24] |
| Lansoprazole | 97%                         | Strongly high affinity [21]     | High affinity [21-26]    |
| Rabeprazole  | 97%                         | Limited data [23]               | High affinity [22,23]    |

<sup>a</sup> n (%)

Table S3. Affinity of uremic toxins to OAT1/3

| Uremic toxin          | Affinity to OAT1/3 [10]                                       | Gut-derived [2] |
|-----------------------|---------------------------------------------------------------|-----------------|
| Indoxyl sulfate       | High affinity for both                                        | yes             |
| Indole-3-acetic acid  | Moderate affinity for both                                    | yes             |
| Kynurenine            | High affinity for both                                        | yes             |
| Kynurenic acid        | Moderate affinity for both                                    | yes             |
| p-cresyl sulfate      | High affinity for both                                        | yes             |
| p-cresyl glucuronide  | No affinity                                                   | yes             |
| Hippuric acid         | High affinity for both                                        | yes             |
| Phenylacetylglutamine | No affinity                                                   | yes             |
| CMPF                  | More studies are needed to confirm, affinity rather for OAT3) | no              |
| TMAO                  | Not confirmed yet                                             | yes             |
| Urée                  | No affinity                                                   | no              |

Figure S1. Distribution of log normalized uremic toxins according to the stages of chronic kidney disease.

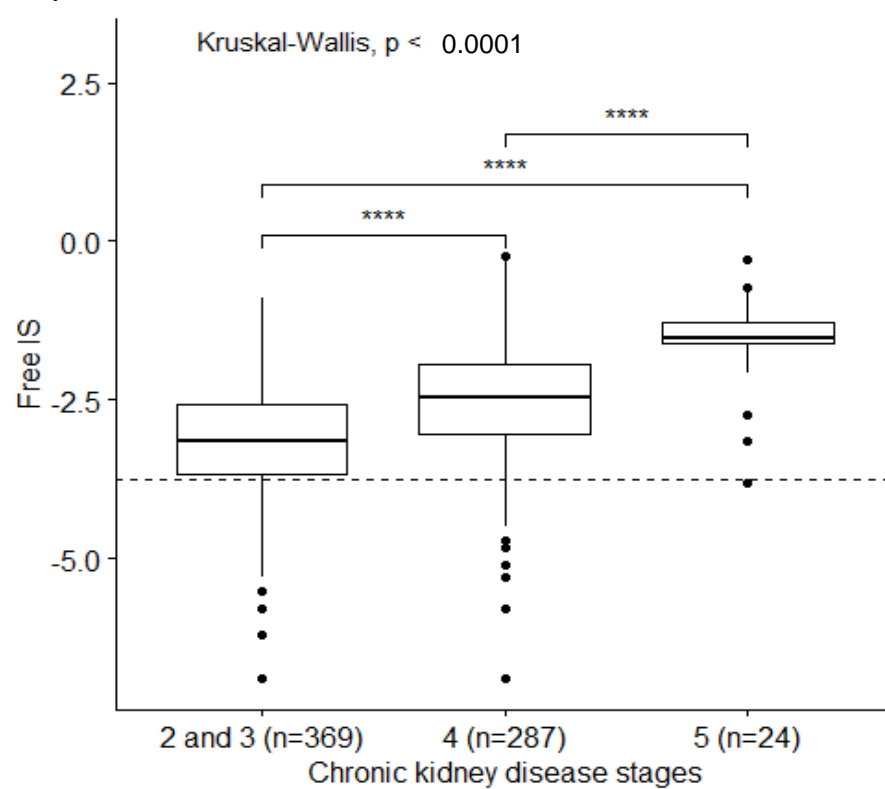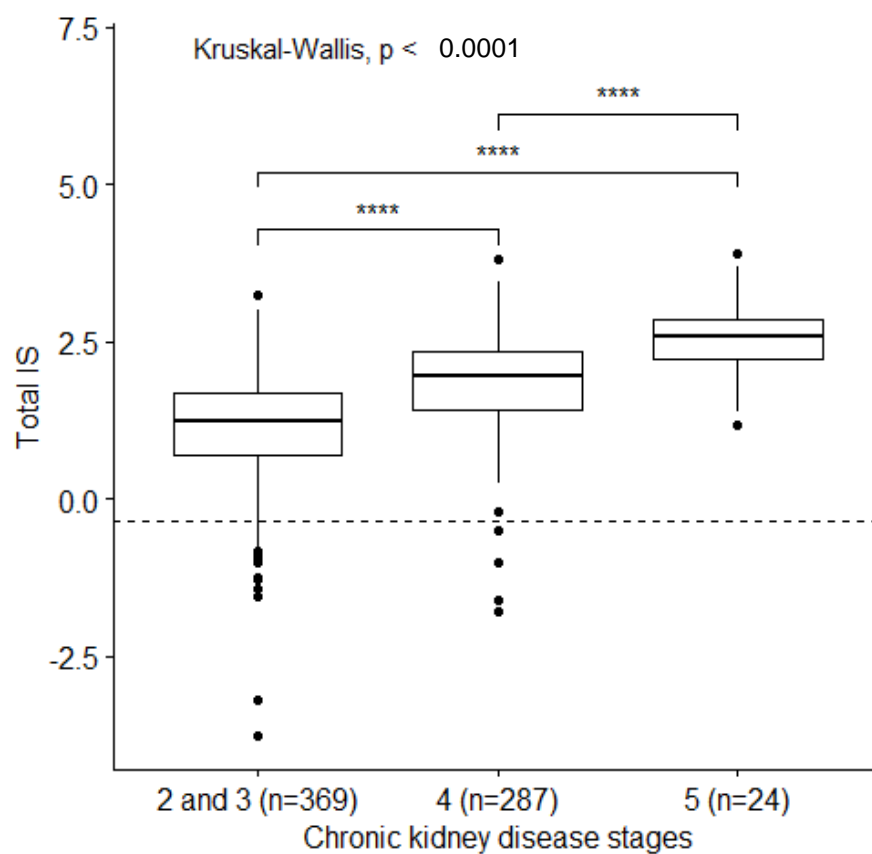

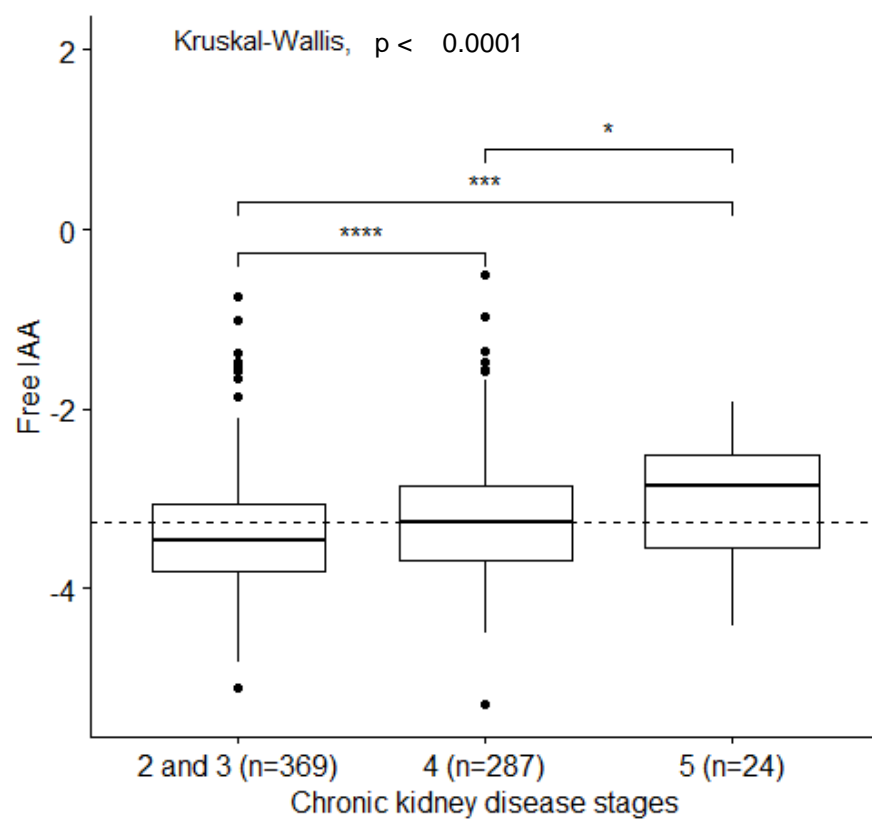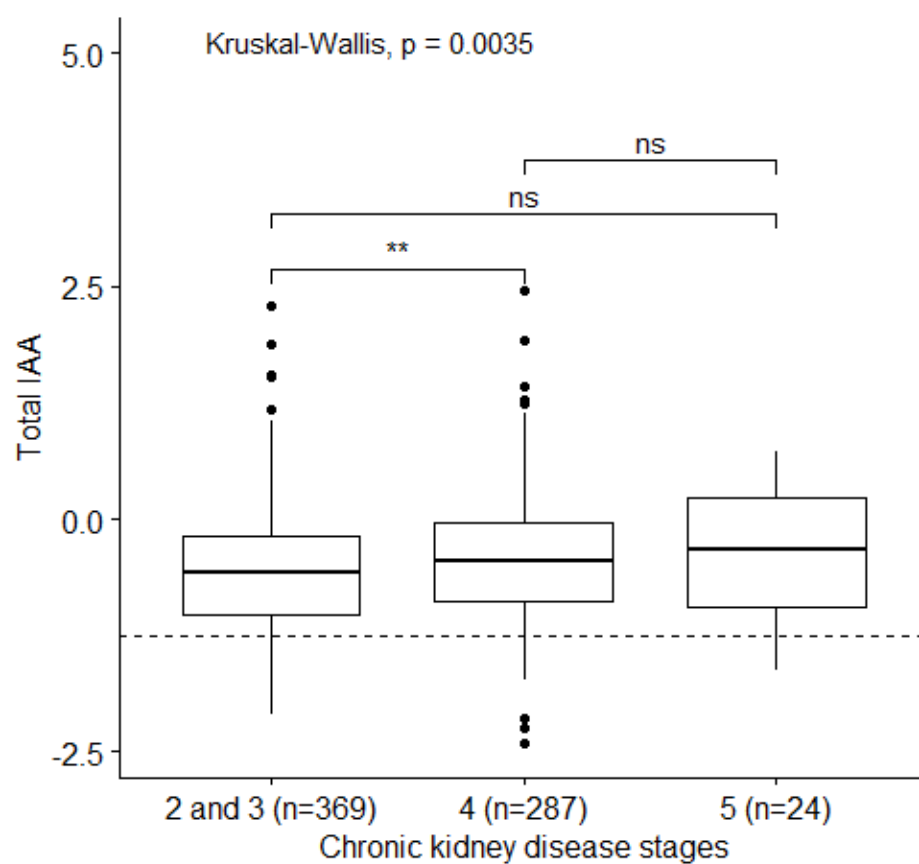

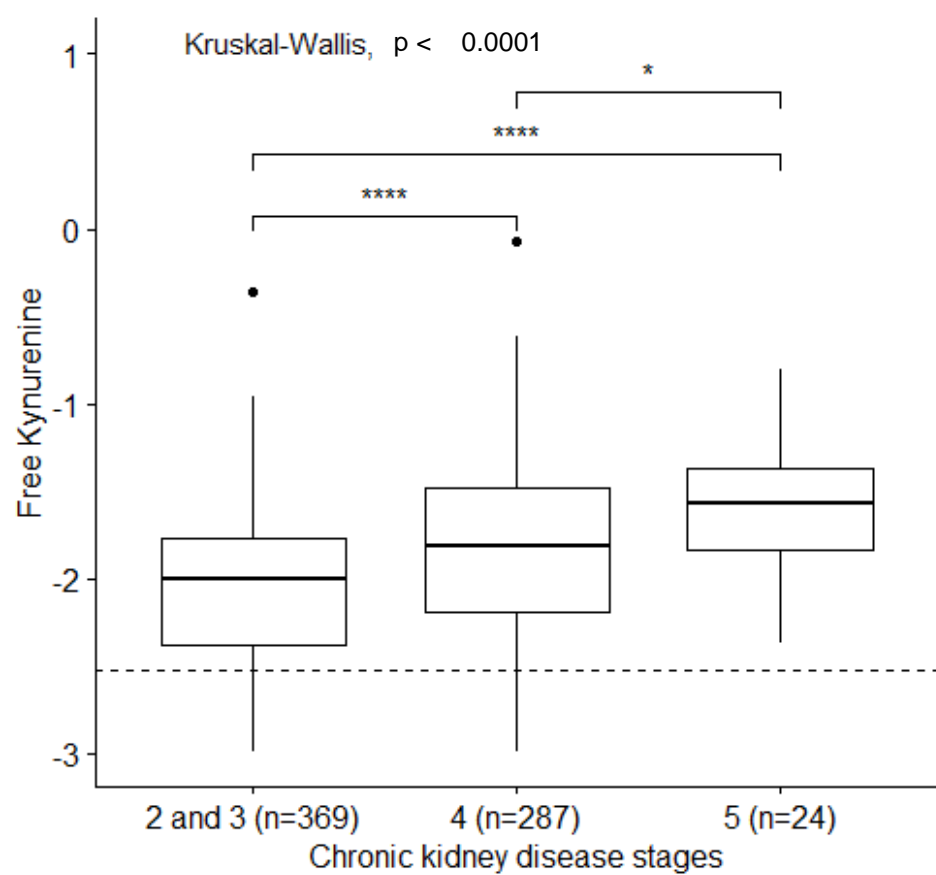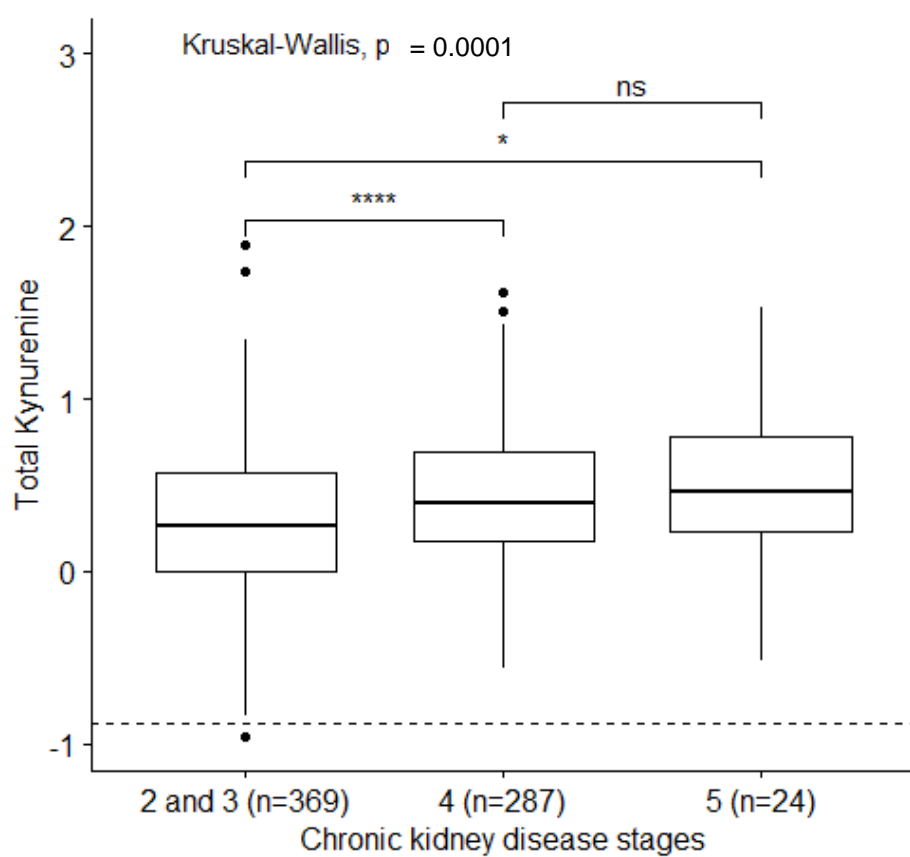

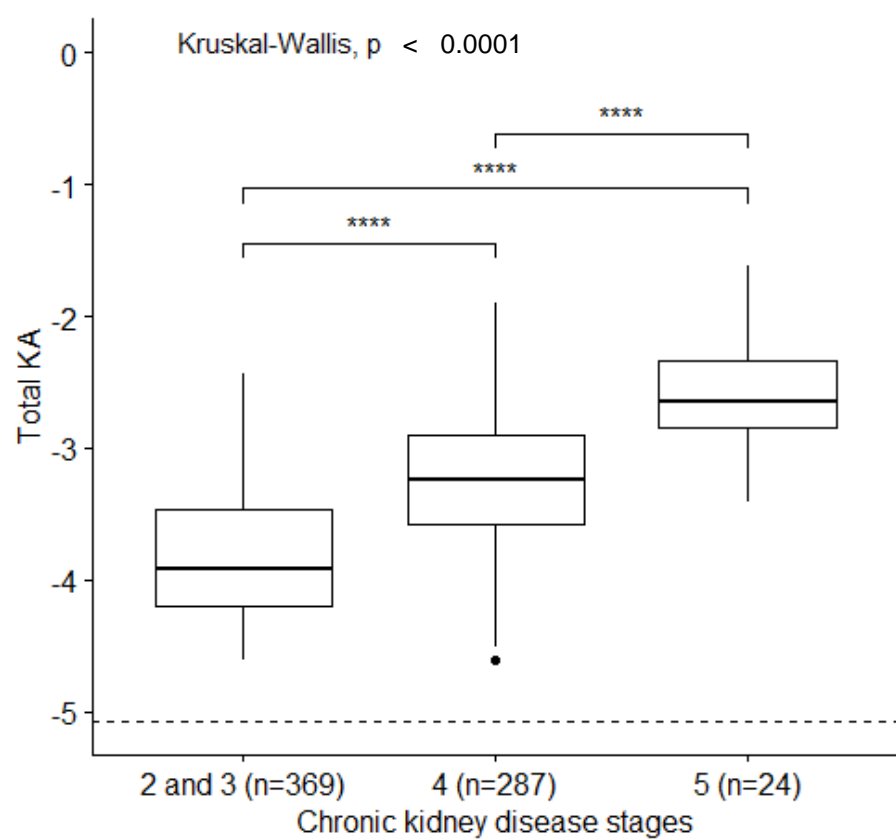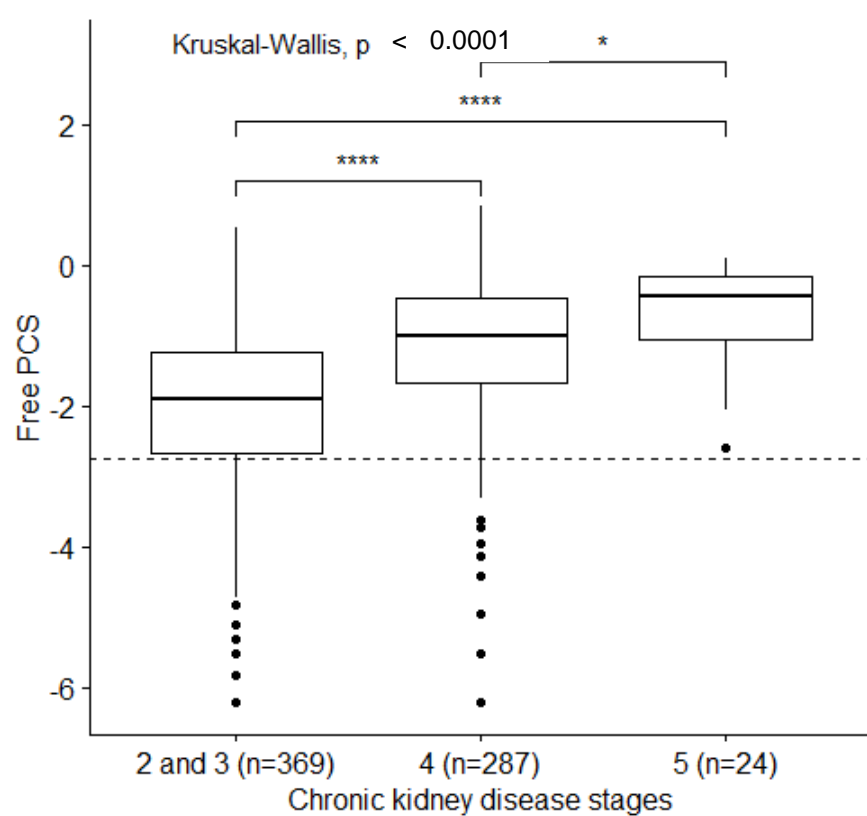

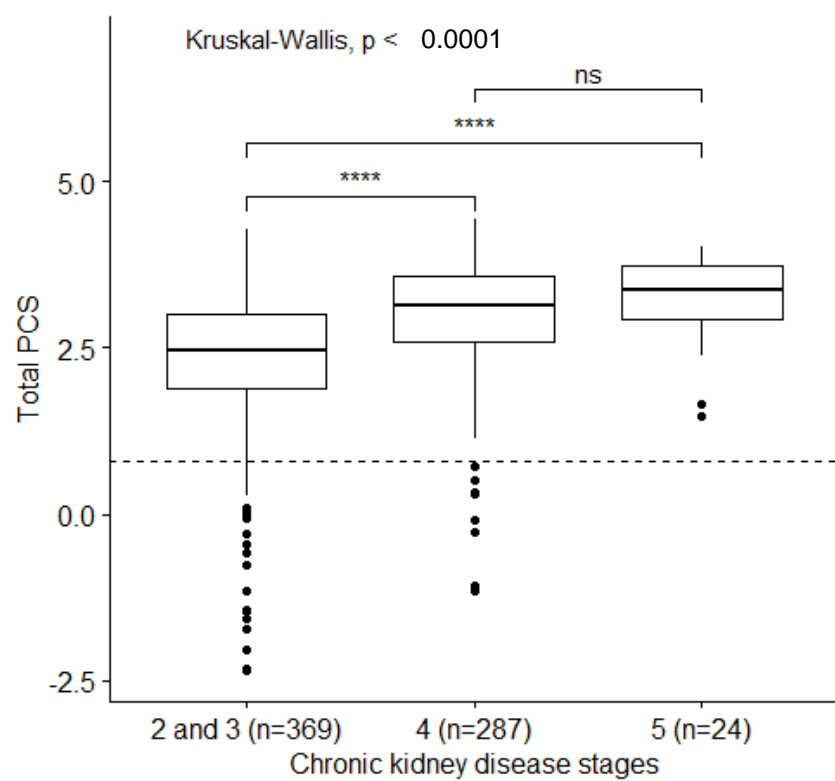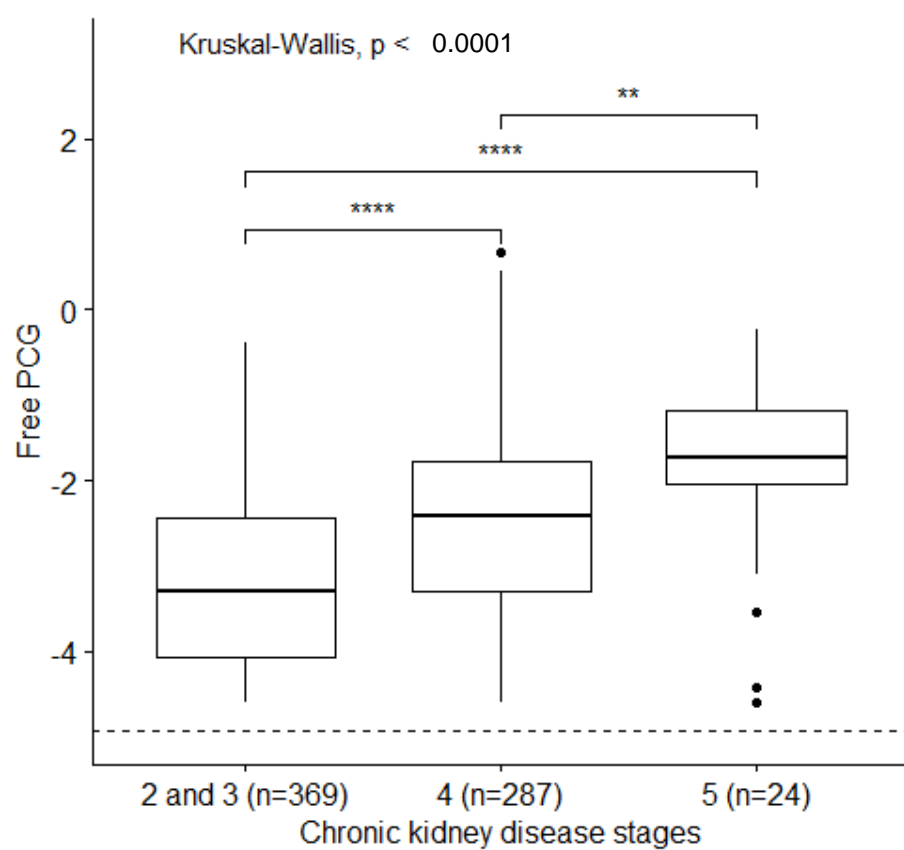

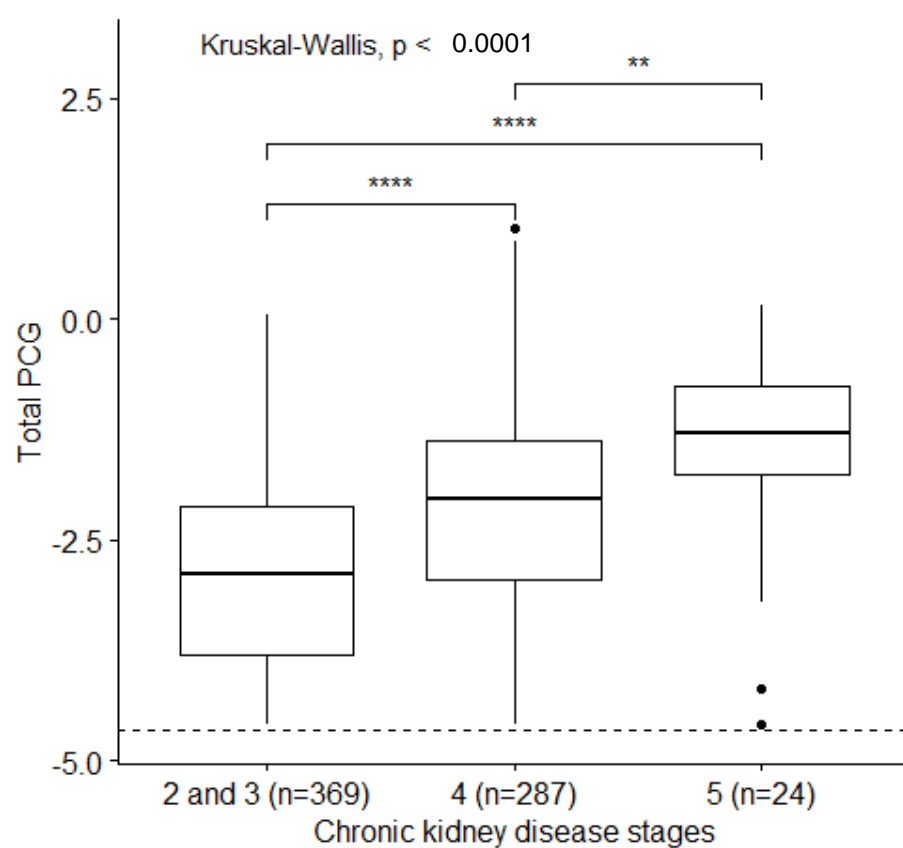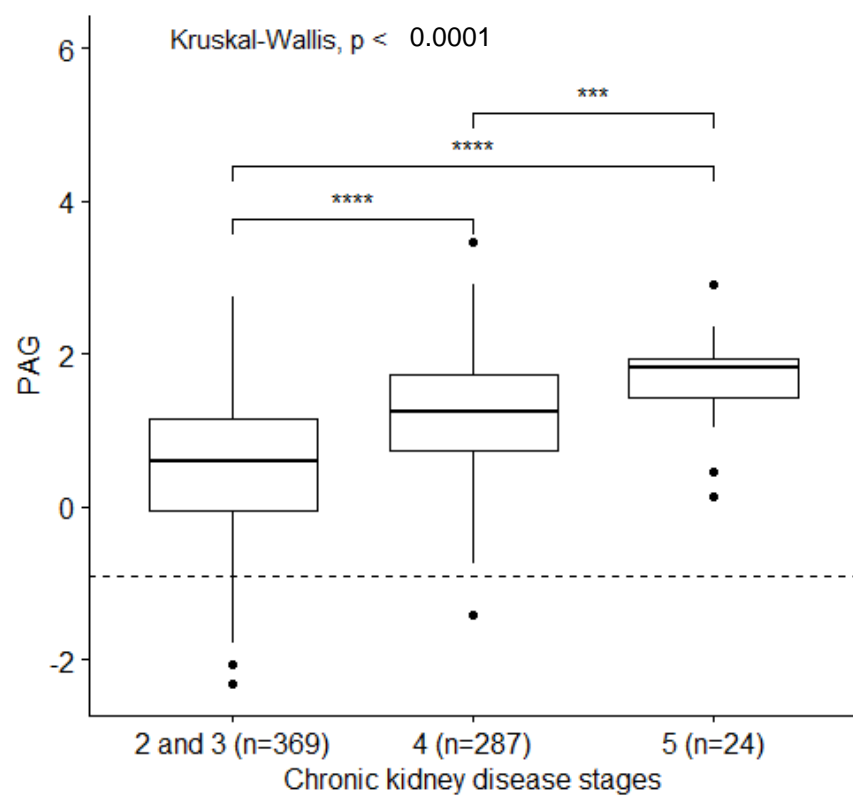



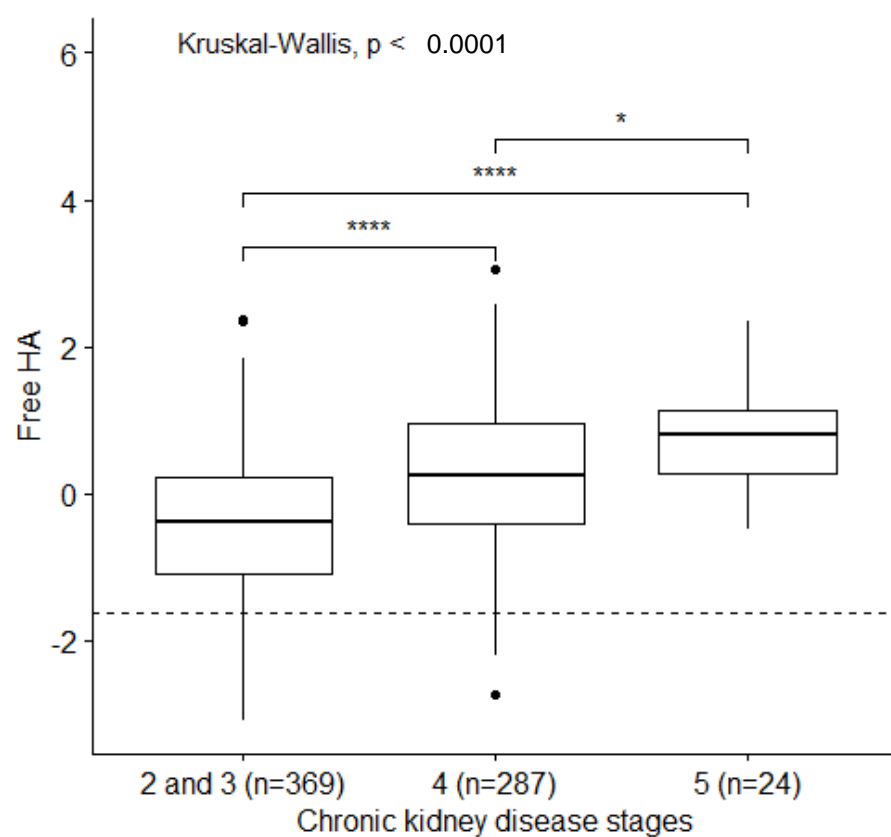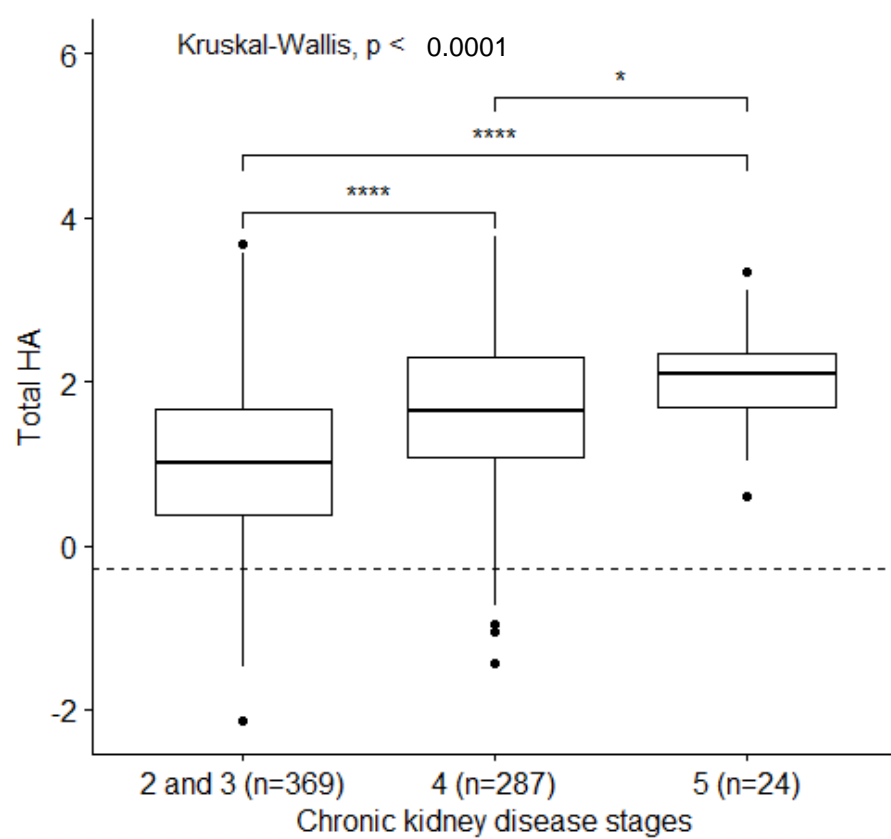

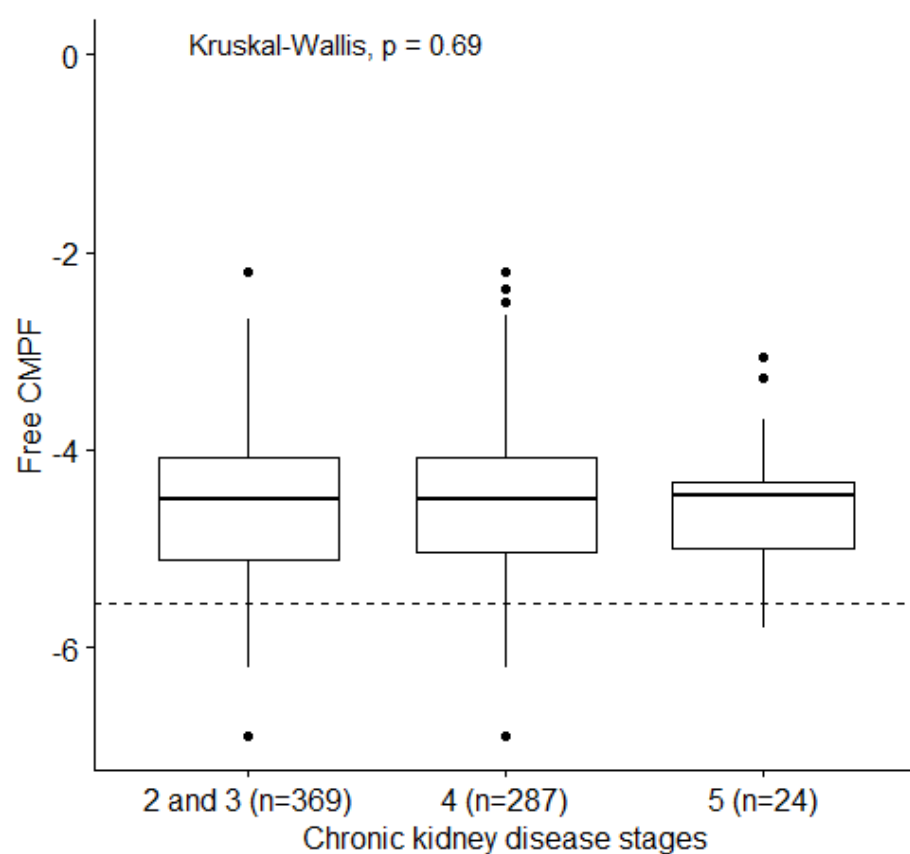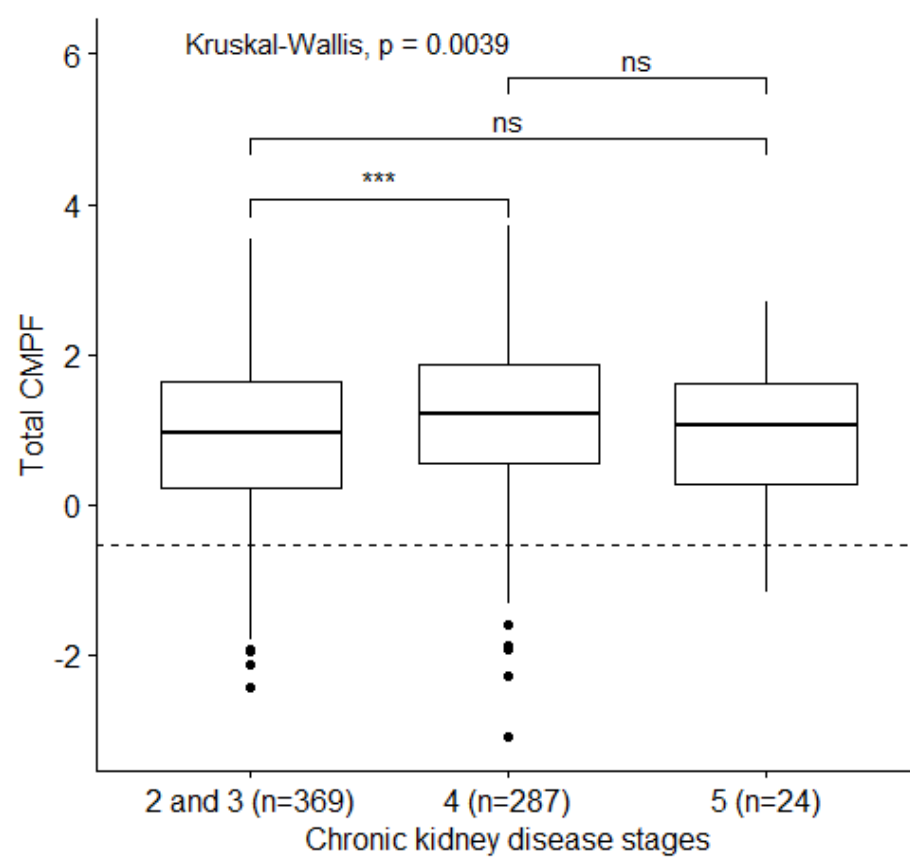

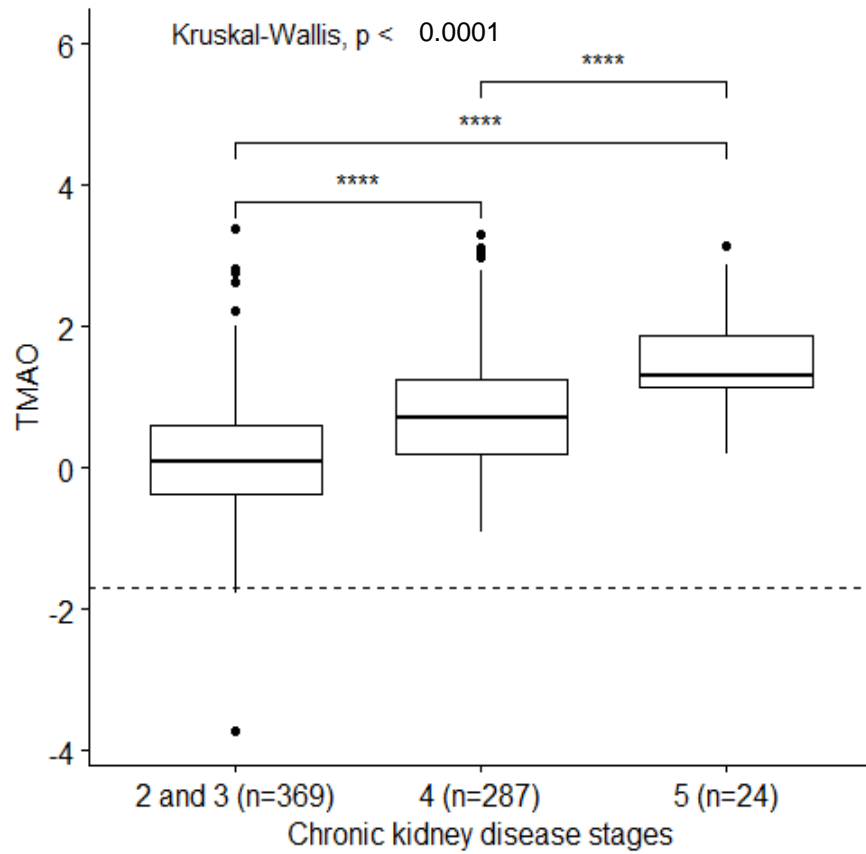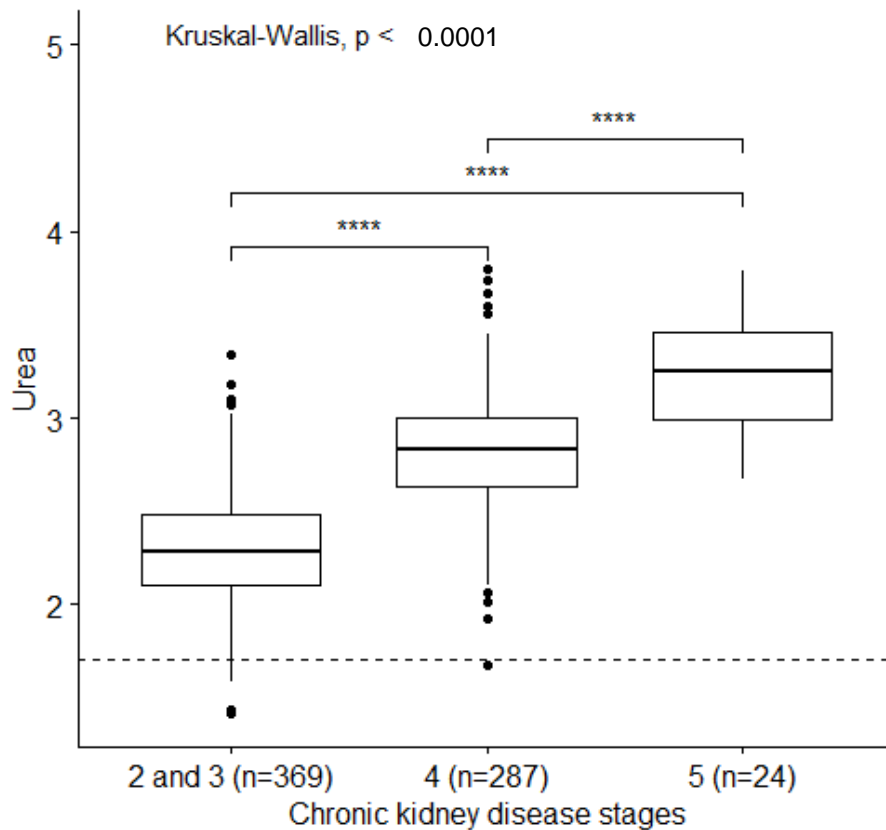

The dotted line indicates the reference value for healthy subjects.

$P$ -values : ns : non significant ; \* :  $<0.05$  ; \*\* :  $<0.01$  ; \*\*\* :  $<0.001$  ; \*\*\*\* :  $<0.0001$ .

Abbreviations : IS, indoxyl sulfate ; IAA, indole-3-acetic acid ; KA, kynurenic acid ; PCS, p-cresyl sulfate ; PCG, p-cresyl glucuronide ; PAG, phenylacetylglutamine ; HA, hippuric acid ; CMPF, 3-carboxy-4-ethyl-5-propyl-2-furanpropanoic acid ; TMAO, trimethylamine N-oxide.

Figure S2. Distribution of log normalized uremic toxins according to proton-pump inhibitor use.

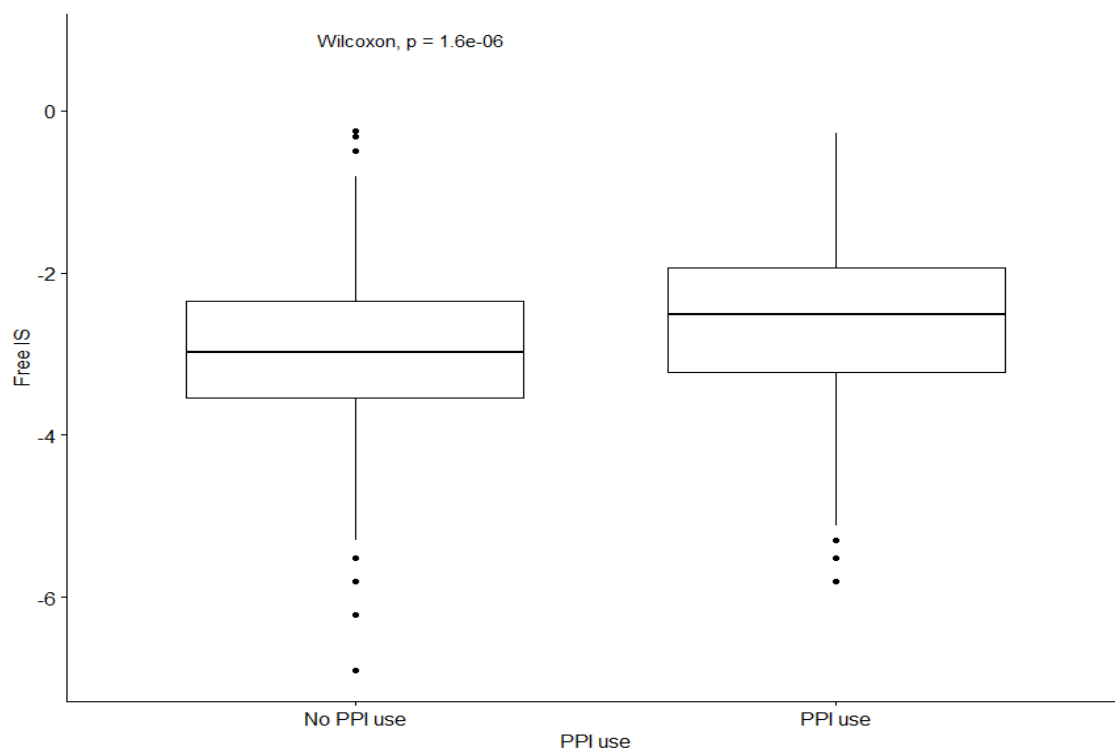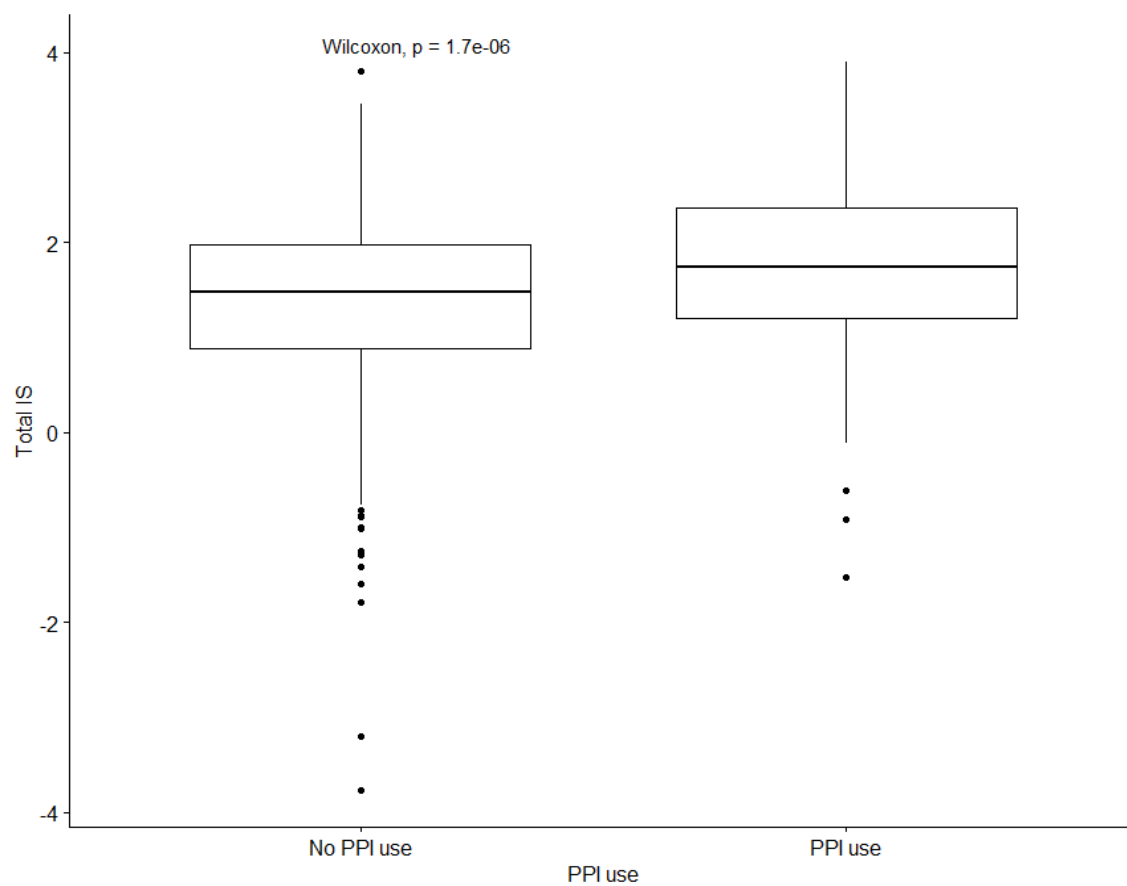

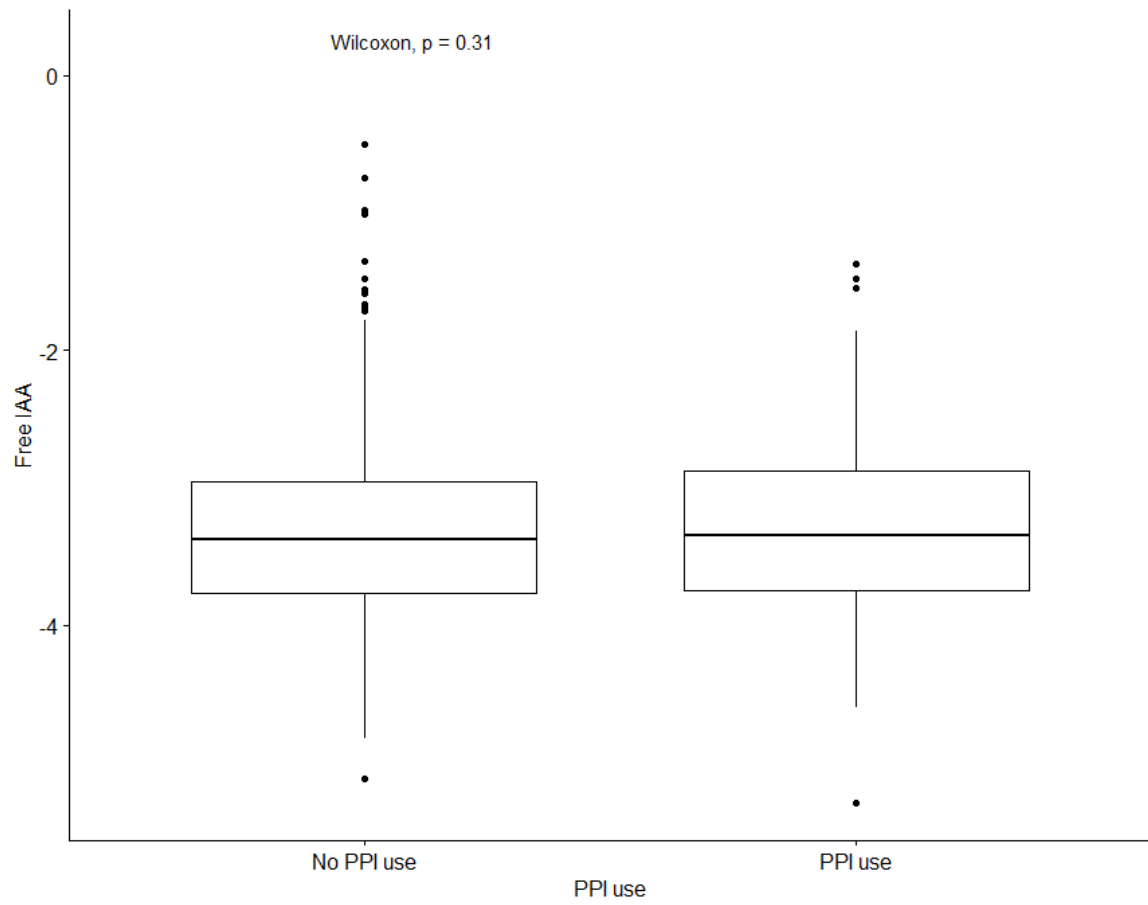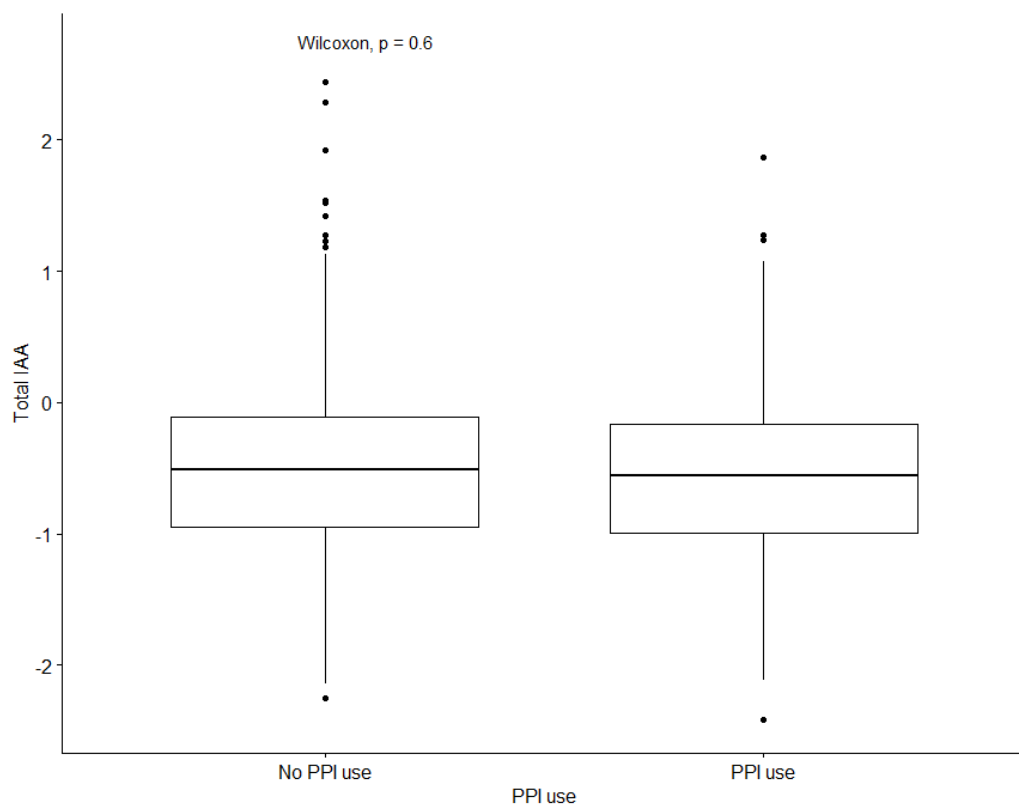

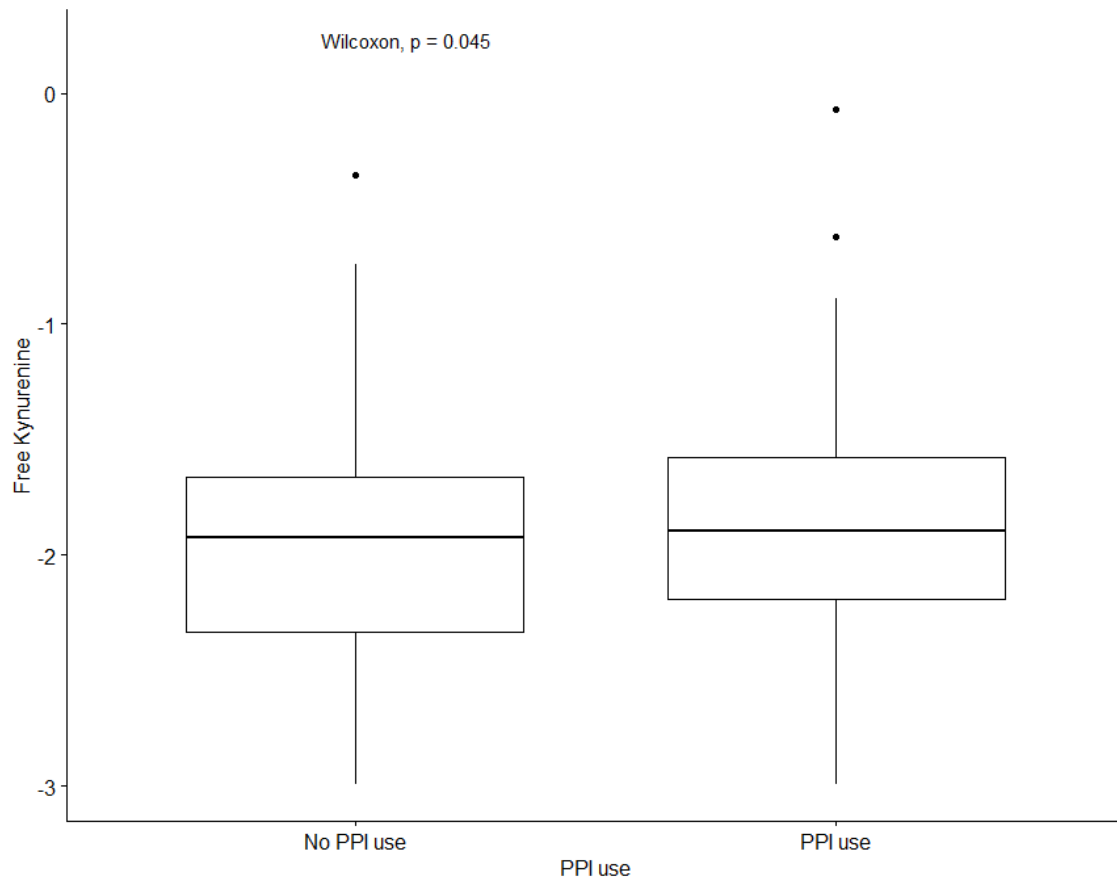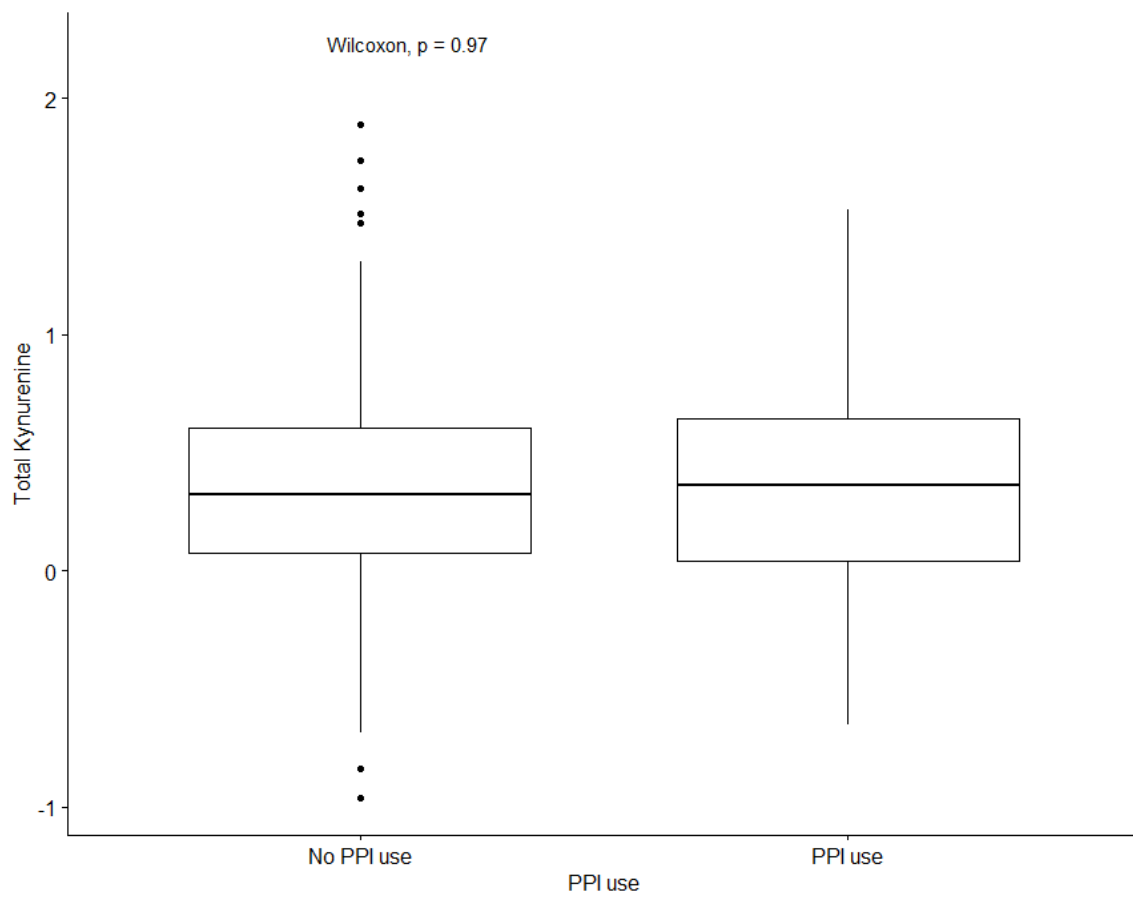

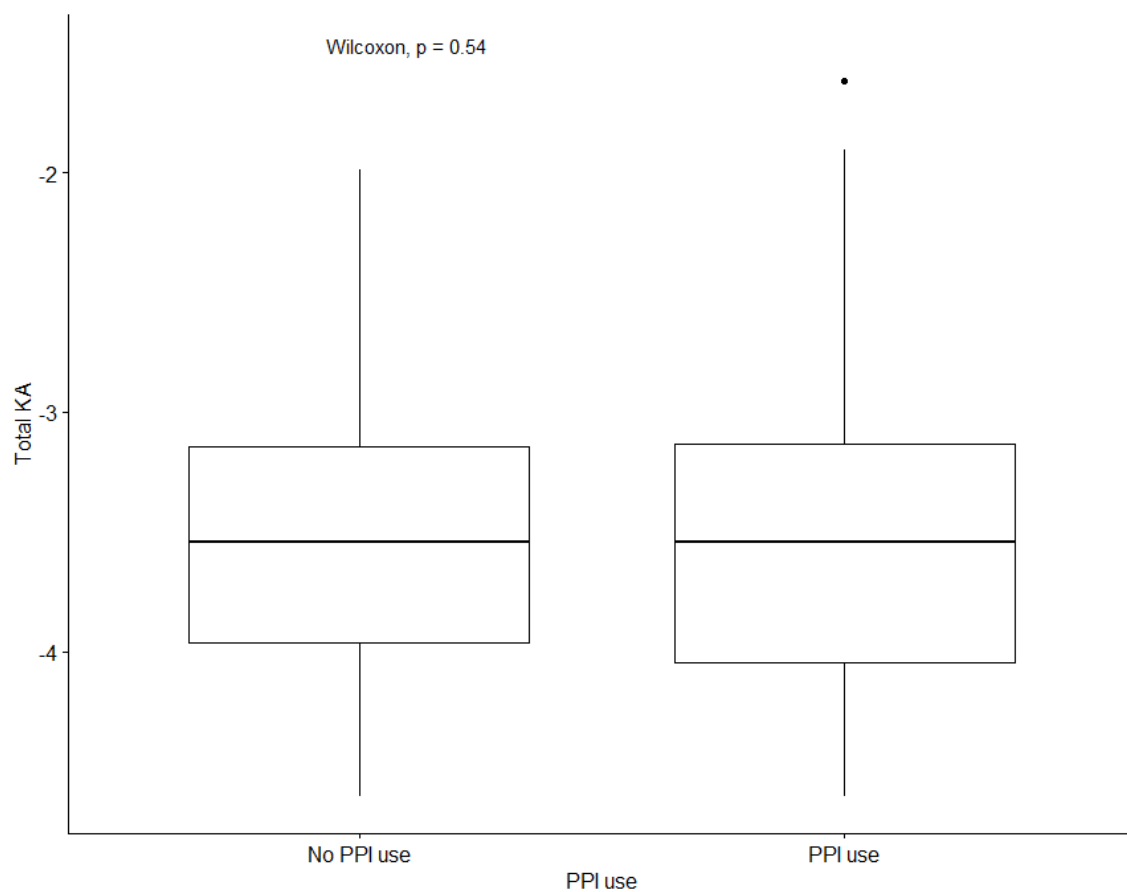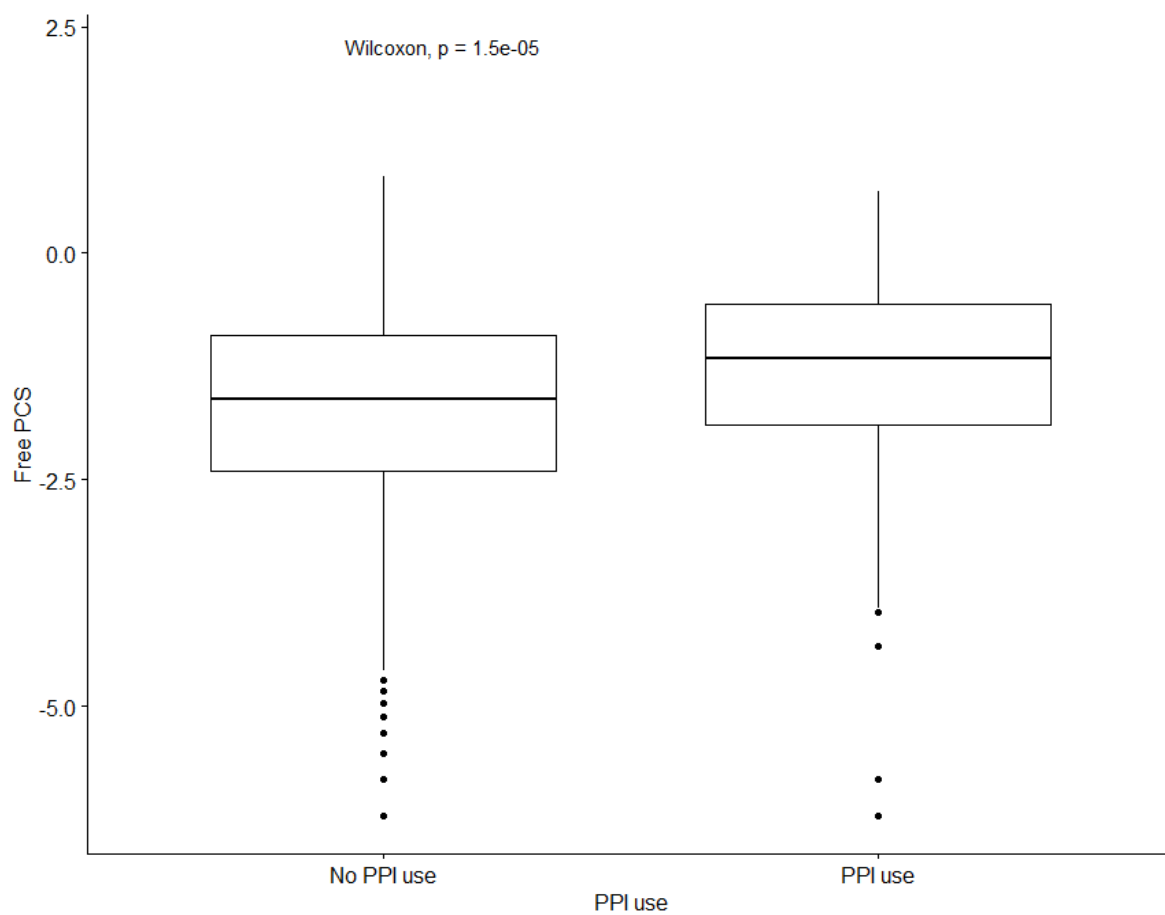

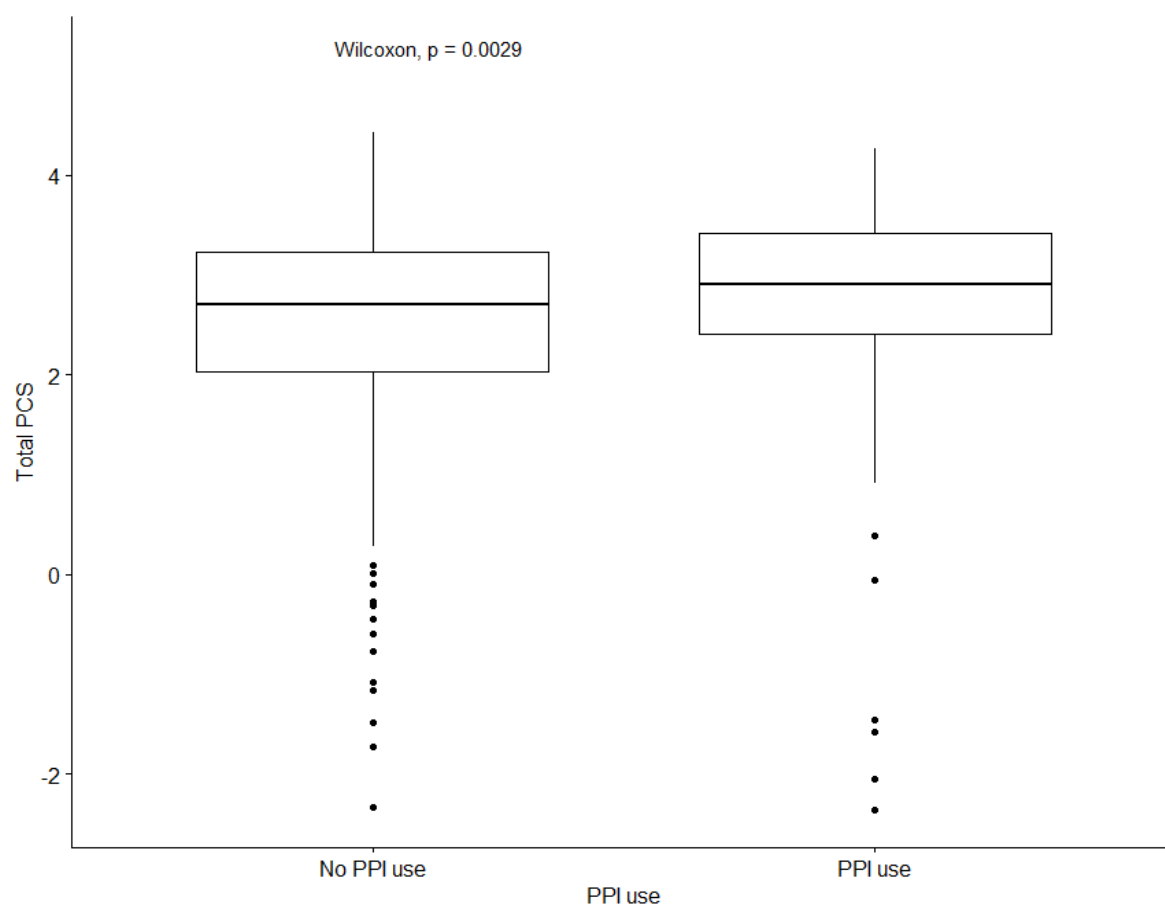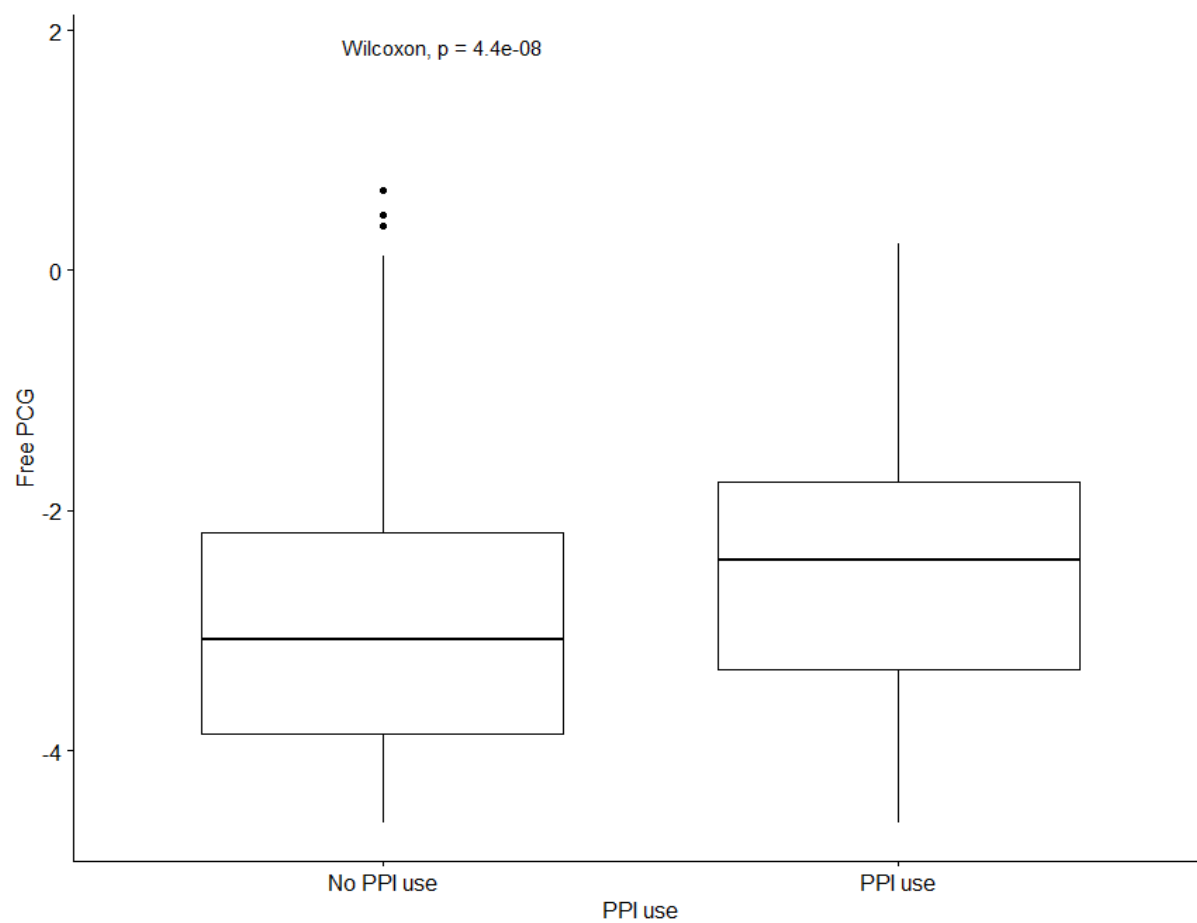



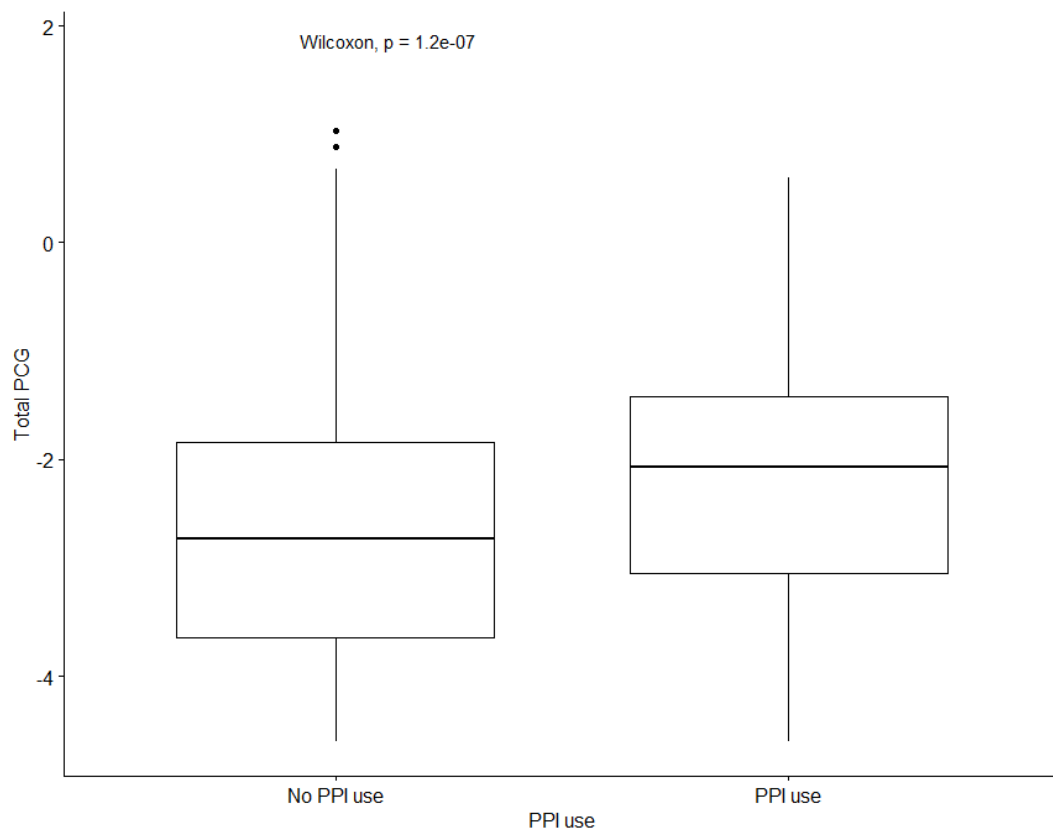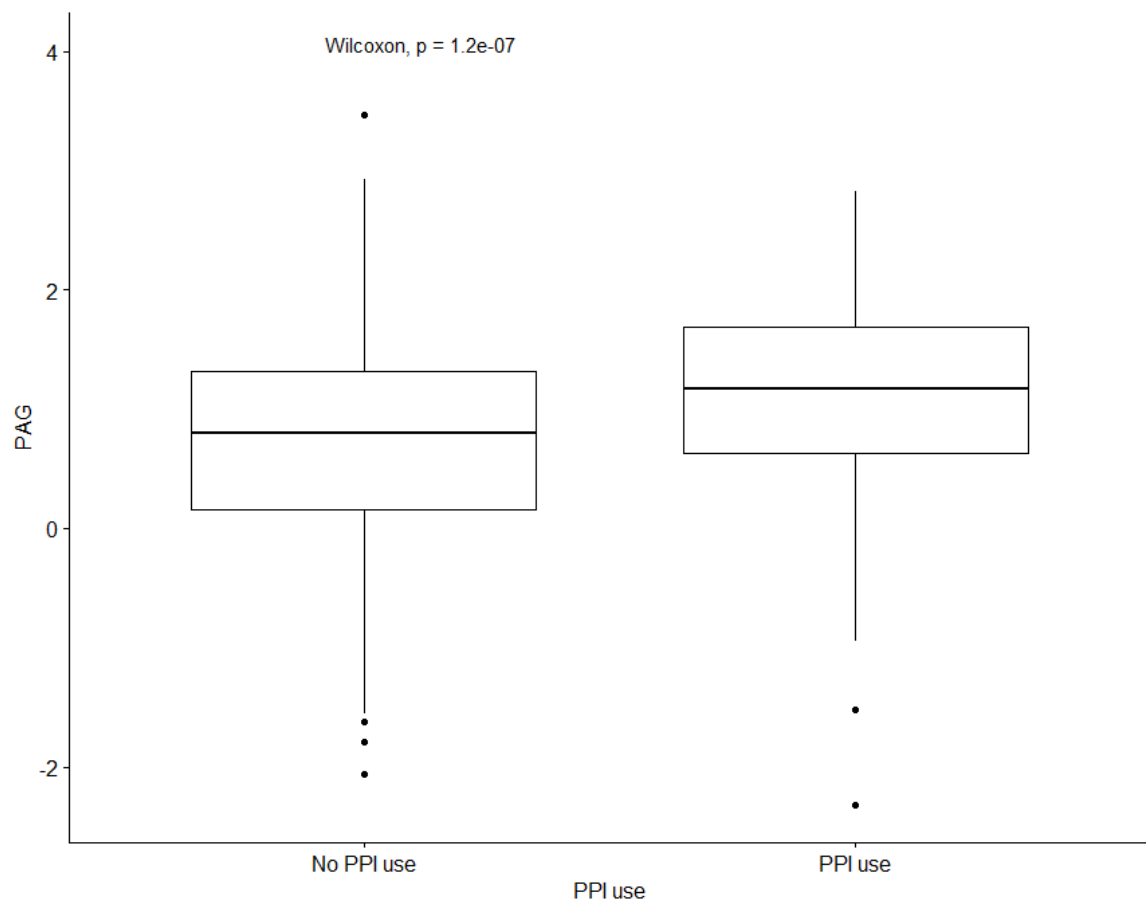

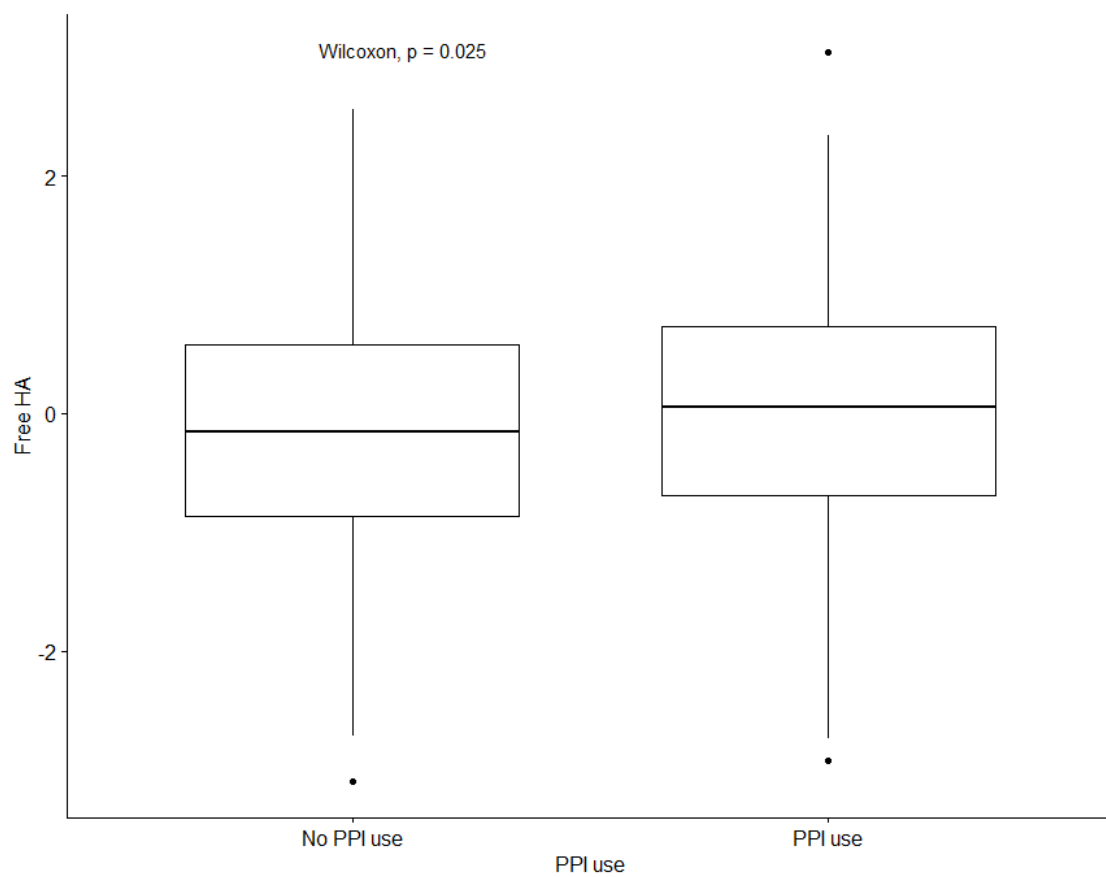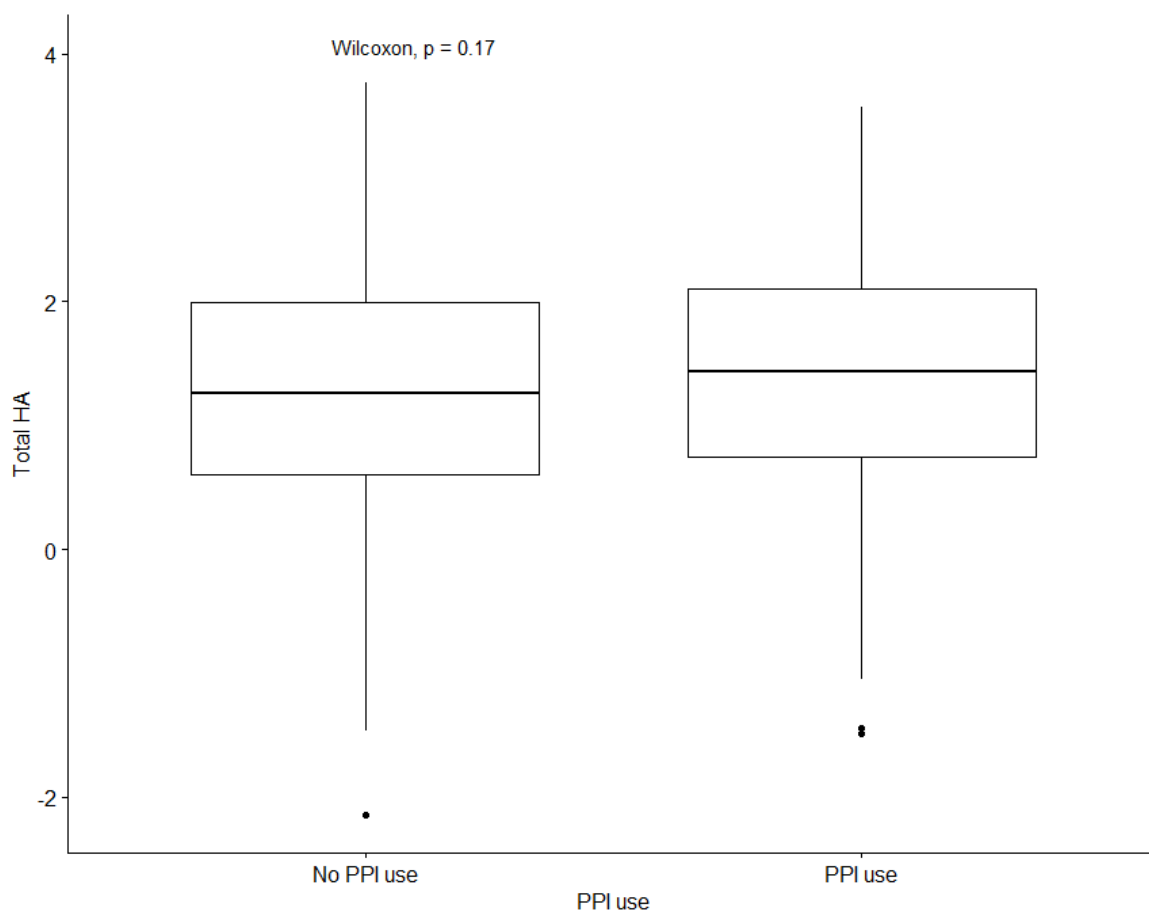

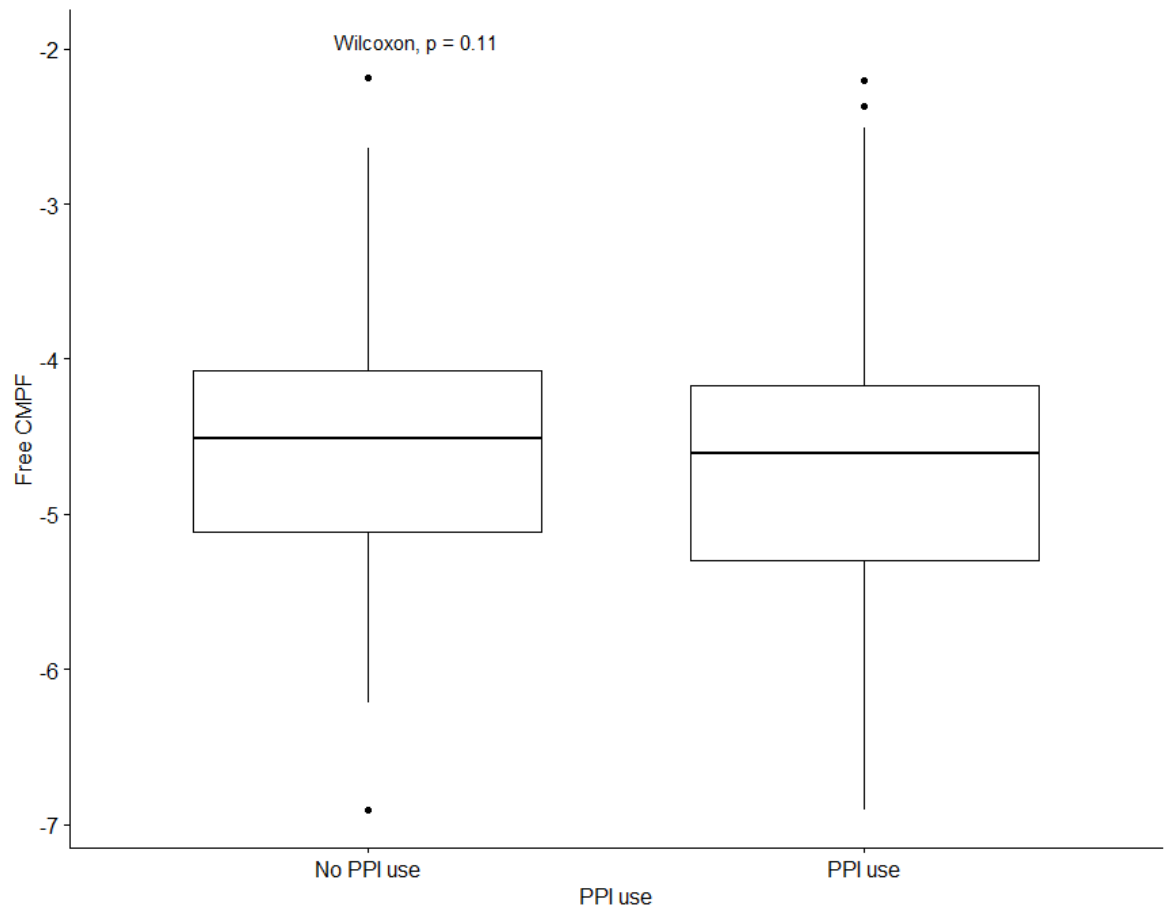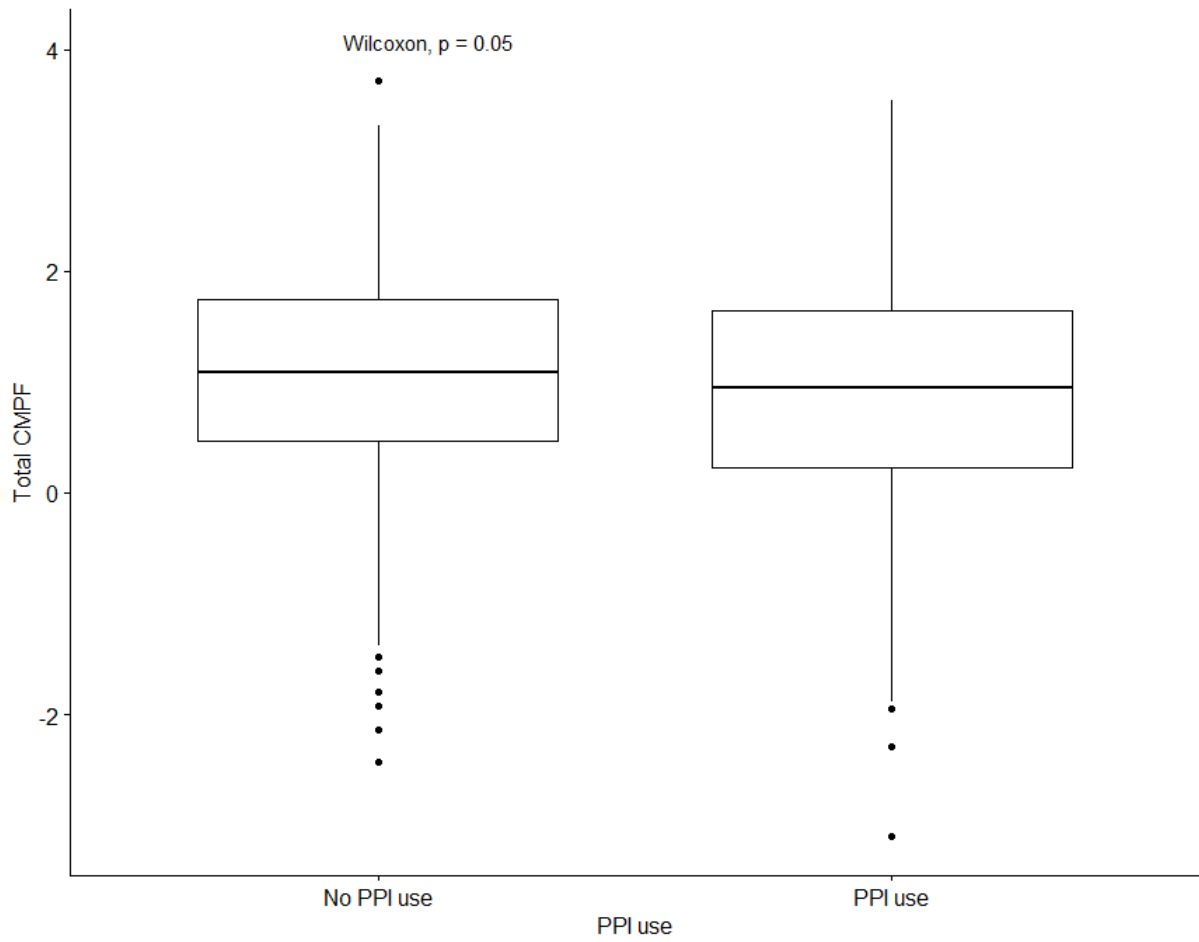

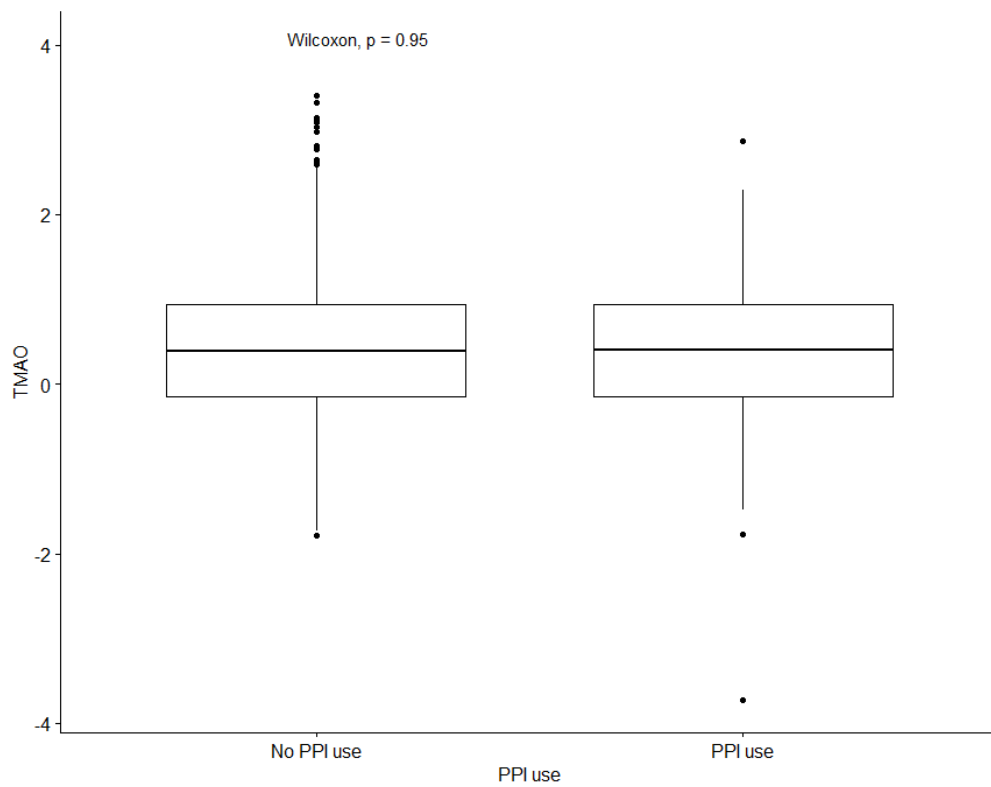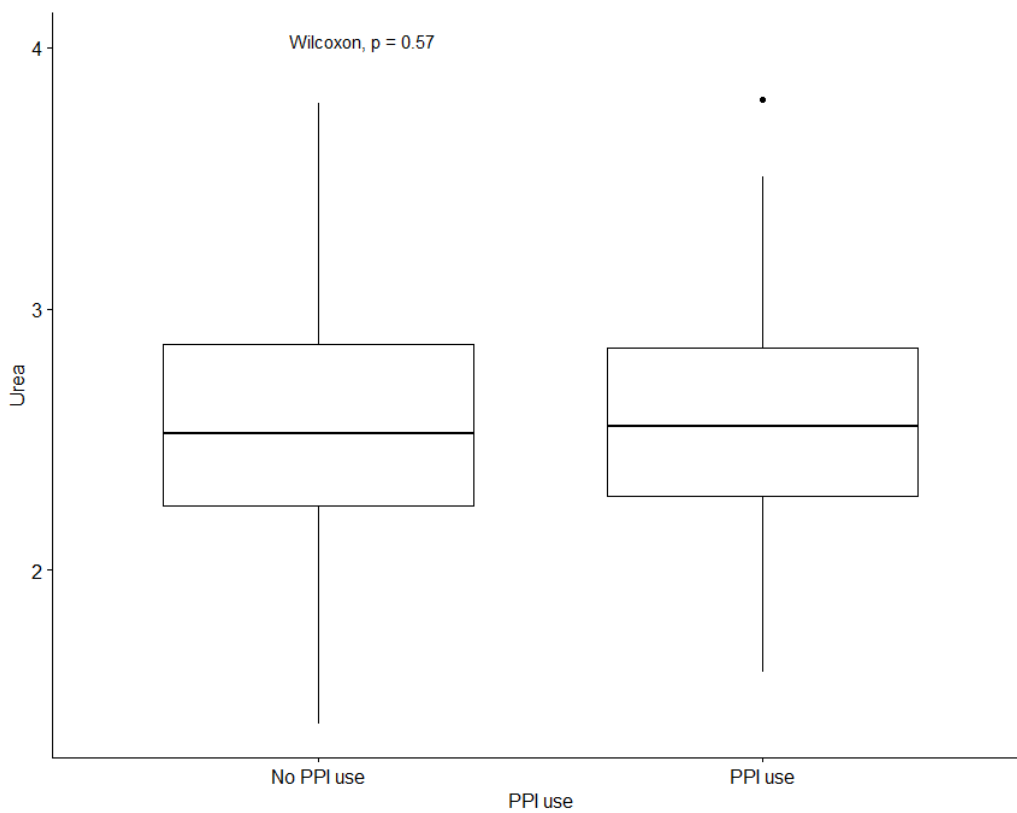

Abbreviations : PPI : proton pump inhibitor ; IS, indoxyl sulfate ; IAA, indole-3-acetic acid ; KA, kynurenic acid ; PCS, p-cresyl sulfate ; PCG, p-cresyl glucuronide ; PAG, phenylacetylglutamine ; HA, hippuric acid ; CMPF, 3-carboxy-4-ethyl-5-propyl-2-furanpropanoic acid ; TMAO, trimethylamine N-oxide.

## List of biological resources centers

The authors would like to thank the teams of all the biological resources centers that participated in the CKD-REIN project:

- Biobanque de Picardie, CRB du Centre Hospitalier Universitaire Amiens Picardie, 1 Rond-Point du Pr Christian Cabrol, 80054 Amiens Cedex 1 (BRIF number: BB-0033-00017)
- NeuroBioTec, CRB des Hospices Civils de Lyon Groupement Hospitalier Est, Hôpital Neurologique, 59 Boulevard Pinel, 69677 Bron Cedex (BRIF number: BB-0033-00046)
- Centre de ressources biologiques du Centre Hospitalier Universitaire de Nantes Hôtel Dieu, Institut de biologie, 9, quai Moncousu, 44093 Nantes Cedex 1 (BRIF number: BB-0033-00040)
- Centre de ressources biologiques du Centre Hospitalier Universitaire Grenoble Alpes, Boulevard de la Chantourne, CS 10217, 38700 La Tronche (BRIF number: BB-0033-00069)
- Centre de ressources biologiques du Centre Hospitalier Régional Universitaire de Nancy, Hôpitaux de Brabois, Bâtiment Recherche Rue du Morvan, 54500 Vandoeuvre-les-Nancy (BRIF number: BB-0033-00035)
- Servicer de Néphrologie, Centre Hospitalier de Perpignan, 20 Avenue du Languedoc, 66046 Perpignan Cedex 9
- Plateforme de Ressources Biologiques, Hôpital Henri Mondor, 51 avenue du Maréchal de Lattre de Tassigny, 94000 Créteil (BRIF number: BB-0033-00021)
- CIC-1435, Centre d'Investigation Clinique Plurithématique, Centre Hospitalier Universitaire de Limoges, 2 Avenue Martin Luther King, 87042 Limoges Cedex
- Plateforme de Ressources Biologiques de l'Hôpital européen Georges-Pompidou, 20-40 rue Leblanc, 75015 Paris (BRIF number: BB-0033-00063)
- Etablissement Français du sang Hauts de France – Normandie, Site de Bois-Guillaume 609, chemin de la Bretèque, 76235 Bois-Guillaume
- Etablissement Français du sang Nouvelle Aquitaine, site Pellegrin, Place Amélie Raba Léon, CS 21010, 33075 Bordeaux Cedex
- Etablissement Français du sang Hauts de France – Normandie, Site de Loos-Eurasanté, Avenue Pierre Mauroy, Parc Eurasante Epi-de Soil, 59120 Loos
- Etablissement Français du sang Ile de France, Site Avicenne, Hopital Avicenne porte 8, 125 route de Stalingrad, 93009 Bobigny
- Etablissement Français du sang Occitanie, Site de Toulouse, 75 rue de Lisieux, 31300 Toulouse
- Etablissement Français du sang Grand-Est, Site de Colmar, 6 rue du Hohnack, 68025 Colmar Cedex
- Etablissement Français du sang Grand-Est, Site de Metz, 6 rue des Dames de Metz, 57000 Metz
- Etablissement Français du sang PACA-Corse, Site de Marseille, 149, boulevard Baille, 13392 Marseille Cedex 05
